# Supplementary material for: Transition-Metal Doped Ceria Microspheres with Nanoporous Structures for CO Oxidation
Source: PubMed Central journal article supplement (PMC4814921; doi:10.1038/srep23900), 2016-03-31
Supplement: srep23900-s1.pdf [file srep23900-s1.pdf]

## Support information

### Transition-Metal Doped Ceria Microspheres with Nanoporous Structures for CO Oxidation

Lin Zhou <sup>1</sup>, Xiaoxiao Li <sup>2</sup>, Ze Yao <sup>4</sup>, Zhuwen Chen <sup>1</sup>, Mei Hong <sup>1</sup>, Rongshu Zhu <sup>4</sup>, Yongye Liang <sup>2</sup>,

Jing Zhao <sup>1,3</sup>

<sup>1</sup> Guangdong Key Lab of Nano-Micro Materials Research, School of Chemical Biology

& Biotechnology, Peking University Shenzhen Graduate School, Shenzhen, 518055, China

<sup>2</sup> Department of Materials Science & Engineering, South University of Science & Technology of China, Shenzhen, 518055, China.

<sup>3</sup> State Key Laboratory of Pharmaceutical Biotechnology, Institute of Chemistry and Biomedical Sciences, School of Life Sciences, Nanjing University, Nanjing, 210093, China.

<sup>4</sup> Environmental Science and Engineering Research Center, School of Civil and Environmental Engineering, Harbin Institute of Technology Shenzhen Graduate School, Shenzhen, 518055, China

## **General Procedures**

### **Sulfonation of porous polymer microspheres**

To obtain sulfonated polymer microspheres, 2.0 g of Poly (GMA-*co*-EGDMA) microspheres was dispersed in 50 mL deionized water, followed by the addition of 9 g of Na<sub>2</sub>SO<sub>3</sub> in 10 mL deionized water. The resulting transparent solution was stirred in oil bath at 70 °C for 24 hours. The white microspheres with sulfonated groups on the surface were obtained by filtration and then washed repeatedly with deionized water and ethanol. After that, the microspheres were dried in the oven at 60 °C overnight, which were denoted as sulfonated polymer microspheres.

### **Preparation of Monodisperse Porous Ceria Microspheres**

To a suspension of 1g of the sulfonated polymer microspheres in 5 mL of water, 2 g of Ce(NO<sub>3</sub>)<sub>3</sub> · 6H<sub>2</sub>O were added. The mixture was transferred to oven set and then heated at 60 °C for 6 h. Then, the poly(GMA-*co*-EGDMA)/cerium microspheres were calcined at 600 °C for 12 h. Finally, monodisperse porous ceria microspheres were obtained.

### **Preparation of Monodisperse Porous Ceria Microspheres Substituted with Cu**

To a suspension of 1g of the sulfonated microspheres in 5 mL water, 2 g of Ce(NO<sub>3</sub>)<sub>3</sub> · 6H<sub>2</sub>O was added into the mixture. At the same time, 64.3 mg of CuSO<sub>4</sub> · 5H<sub>2</sub>O were added. The mixed solution was transferred to oven set at 60 °C and then heat-treated for 6 h. Finally, the obtained poly (GMA-*co*-EGDMA)/cerium microspheres with Cu<sup>2+</sup> were calcined at 600 °C for 12 h. After that,

$\text{Cu}_x\text{CeO}_{2-x}$  microspheres were obtained. The microspheres were then further activated at 330 °C for 3 h in flowing  $\text{H}_2/\text{N}_2$  (0.5/99.5 v/v) at a heating rate of 10 °C/min.

#### **Preparation of Monodisperse Porous Ceria Microspheres Substituted with Co**

To a suspension of 1 g of the sulfonated microspheres in 5 mL water, 2 g of  $\text{Ce}(\text{NO}_3)_3 \cdot 6\text{H}_2\text{O}$  and 68.0 mg of  $\text{Co}(\text{OAc})_2 \cdot 4\text{H}_2\text{O}$  were added. The mixed suspension was transferred to oven and then heat-treated at 60 °C for 6 h. The obtained polymer/cerium microspheres substituted with  $\text{Co}^{2+}$  were calcined at 600 °C for 12 h. After that, the  $\text{Co}_x\text{CeO}_{2-x}$  microspheres were treated at 330 °C for 3 h in flowing  $\text{H}_2/\text{N}_2$  (0.5/99.5 v/v) at a heating rate of 10 °C /min.

#### **Preparation of Monodisperse Porous Ceria Microspheres Substituted with Ni**

1g of the sulfonated microspheres in 5 mL water was mixed with 2 g of  $\text{Ce}(\text{NO}_3)_3 \cdot 6\text{H}_2\text{O}$ , followed by the addition of 65.6 mg of  $\text{Ni}(\text{OAc})_2 \cdot 4\text{H}_2\text{O}$ . The mixture was heat treated in the oven at 60 °C for 6 h. After calcination at 600 °C for 12 h,  $\text{Ni}_x\text{CeO}_{2-x}$  microspheres were obtained. Further activation was conducted at 330 °C for 3 h under the same reaction condition as  $\text{Cu}_x\text{CeO}_{2-x}$ .

#### **Preparation of Monodisperse Porous Ceria Microspheres Substituted with Fe**

In the sol-gel process, 1g of the sulfonated microspheres, 2 g of  $\text{Ce}(\text{NO}_3)_3 \cdot 6\text{H}_2\text{O}$  and 103.3 mg of  $\text{Fe}(\text{NO}_3)_3 \cdot 9\text{H}_2\text{O}$  were dispersed in 5 mL of  $\text{H}_2\text{O}$ . After thermally treated at 60 °C for 6 h, polymer/cerium/ $\text{Fe}^{3+}$  hybrids were obtained. The microspheres were then calcined at 600 °C for 12 h. After heat-treated at 330 °C for 3 h in flowing  $\text{H}_2/\text{N}_2$  (0.5/99.5 v/v),  $\text{Fe}_x\text{CeO}_{2-x}$  microspheres were synthesized.

## Preparation of Monodisperse Porous Ceria Microspheres Substituted with Mn

1g of the sulfonated microspheres and 2 g of  $\text{Ce}(\text{NO}_3)_3 \cdot 6\text{H}_2\text{O}$  were dispersed in 5 mL water. Also, 59.8 mg of  $\text{MnCl}_2 \cdot 4\text{H}_2\text{O}$  was mixed with the above suspension. The mixture was put in the oven set at 60 °C for 6 h. After calcination at 600 °C for 12 h, the as-obtained Mn oxide substituted  $\text{CeO}_2$  microspheres were further treated at 330 °C for 3 h in flowing  $\text{H}_2/\text{N}_2$  (0.5/99.5 v/v) at a heating rate of 10 °C /min.

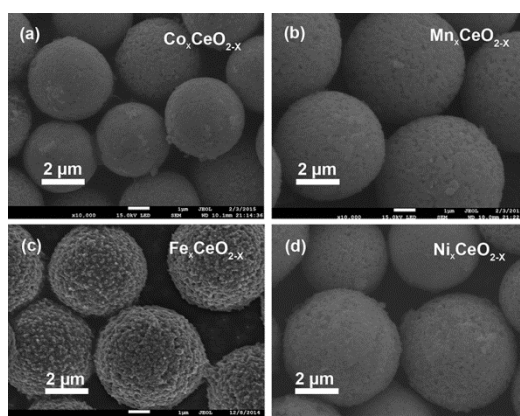

**Supplementary Figure S1.** SEM images of  $\text{M}_x\text{CeO}_{2-x}$  microspheres: (a)  $\text{Co}_x\text{CeO}_{2-x}$ , (b)  $\text{Mn}_x\text{CeO}_{2-x}$ , (c)  $\text{Fe}_x\text{CeO}_{2-x}$  and (d)  $\text{Ni}_x\text{CeO}_{2-x}$  microspheres.

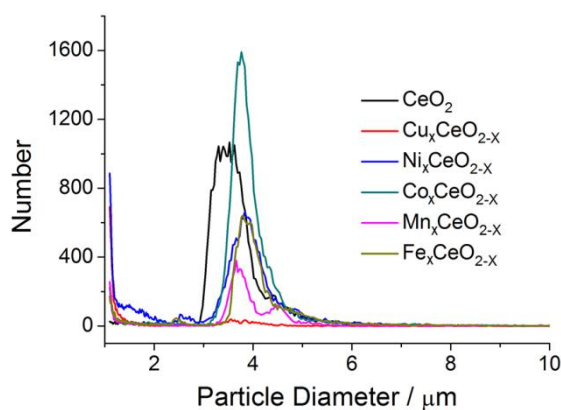

**Supplementary Figure S2.** The particle size distribution of  $\text{CeO}_2$  microspheres (black line),  $\text{Cu}_x\text{CeO}_{2-x}$  microspheres (red line),  $\text{Ni}_x\text{CeO}_{2-x}$  microspheres (blue line),  $\text{Co}_x\text{CeO}_{2-x}$  microspheres (green line),  $\text{Mn}_x\text{CeO}_{2-x}$  microspheres (pink line) and  $\text{Fe}_x\text{CeO}_{2-x}$  microspheres (yellow green line).

**Supplementary Table S1.** Textural properties of metal substituted microspheres.

| Entry | Microspheres                       | BET Surface Area (m <sup>2</sup> /g) | BET Average PoreSize (nm) | t-Plot Micropore Area (m <sup>2</sup> /g) | BJH Pore Volume (cm <sup>3</sup> /g) | Metal Content (mol%) by ICP-OES | Metal Content (mol %) by EDS-mapping |
|-------|------------------------------------|--------------------------------------|---------------------------|-------------------------------------------|--------------------------------------|---------------------------------|--------------------------------------|
| 1     | Polymer                            | 114                                  | 35.23                     | 25                                        | 0.80                                 | -                               | -                                    |
| 2     | CeO <sub>2</sub>                   | 12                                   | 21.94                     | 8                                         | 0.07                                 | -                               | -                                    |
| 3     | Cu <sub>x</sub> CeO <sub>2-x</sub> | 9                                    | 21.88                     | 5                                         | 0.06                                 | 10                              | 9                                    |
| 4     | Fe <sub>x</sub> CeO <sub>2-x</sub> | 19                                   | 22.69                     | 9                                         | 0.13                                 | 10                              | 25                                   |
| 5     | Co <sub>x</sub> CeO <sub>2-x</sub> | 11                                   | 36.88                     | 10                                        | 0.11                                 | 10                              | 11                                   |
| 6     | Ni <sub>x</sub> CeO <sub>2-x</sub> | 17                                   | 24.01                     | 8                                         | 0.12                                 | 10                              | 11                                   |
| 7     | Mn <sub>x</sub> CeO <sub>2-x</sub> | -                                    | -                         | -                                         | -                                    | 10                              | 13                                   |

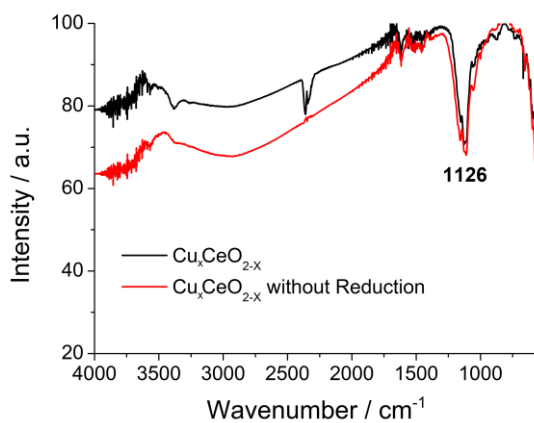

**Supplementary Figure S3.** DFTIR spectra of Cu<sub>x</sub>CeO<sub>2-x</sub> microspheres before and after H<sub>2</sub> reduction.

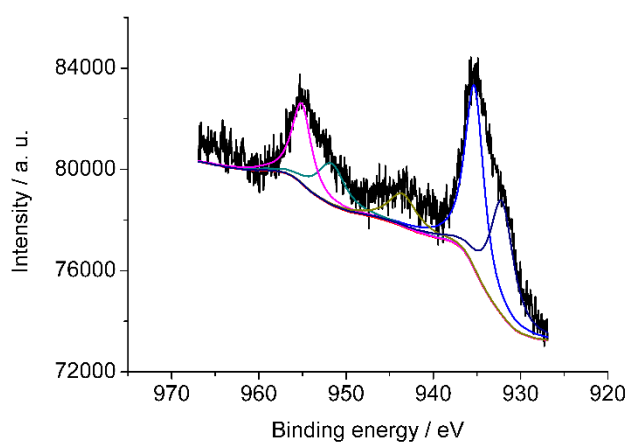

**Supplementary Figure S4.** XPS of Cu 2p region in Cu<sub>x</sub>CeO<sub>2-x</sub> microspheres.

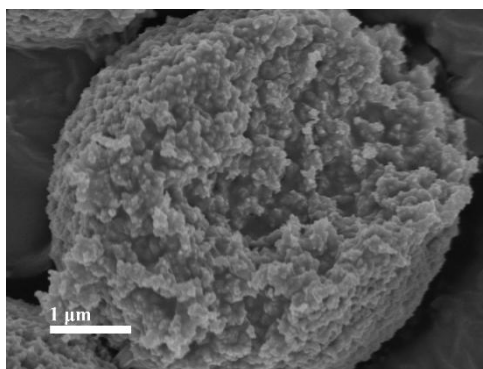

**Supplementary Figure S5.** SEM of an individual  $\text{Cu}_x\text{CeO}_{2-x}$  microspheres.

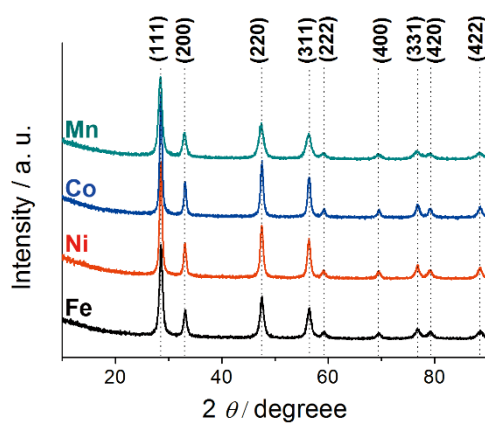

**Supplementary Figure S6.** XRD patterns of  $\text{M}_x\text{CeO}_{2-x}$  microspheres:  $\text{Fe}_x\text{CeO}_{2-x}$ ,  $\text{Ni}_x\text{CeO}_{2-x}$ ,  $\text{Co}_x\text{CeO}_{2-x}$  and  $\text{Mn}_x\text{CeO}_{2-x}$  microspheres.

**Supplementary Table S2.** Oxygen vacancy contents determined by XPS analysis of Ce 3d spectra.

| Entry | Microspheres                  | Oxygen vacancy Content (% XPS) |
|-------|-------------------------------|--------------------------------|
| 1     | $\text{Cu}_x\text{CeO}_{2-x}$ | 14.5                           |
| 2     | $\text{Co}_x\text{CeO}_{2-x}$ | 11.4                           |
| 3     | $\text{Ni}_x\text{CeO}_{2-x}$ | 12.7                           |
| 4     | $\text{Mn}_x\text{CeO}_{2-x}$ | 13.6                           |
| 5     | $\text{Fe}_x\text{CeO}_{2-x}$ | 12.0                           |

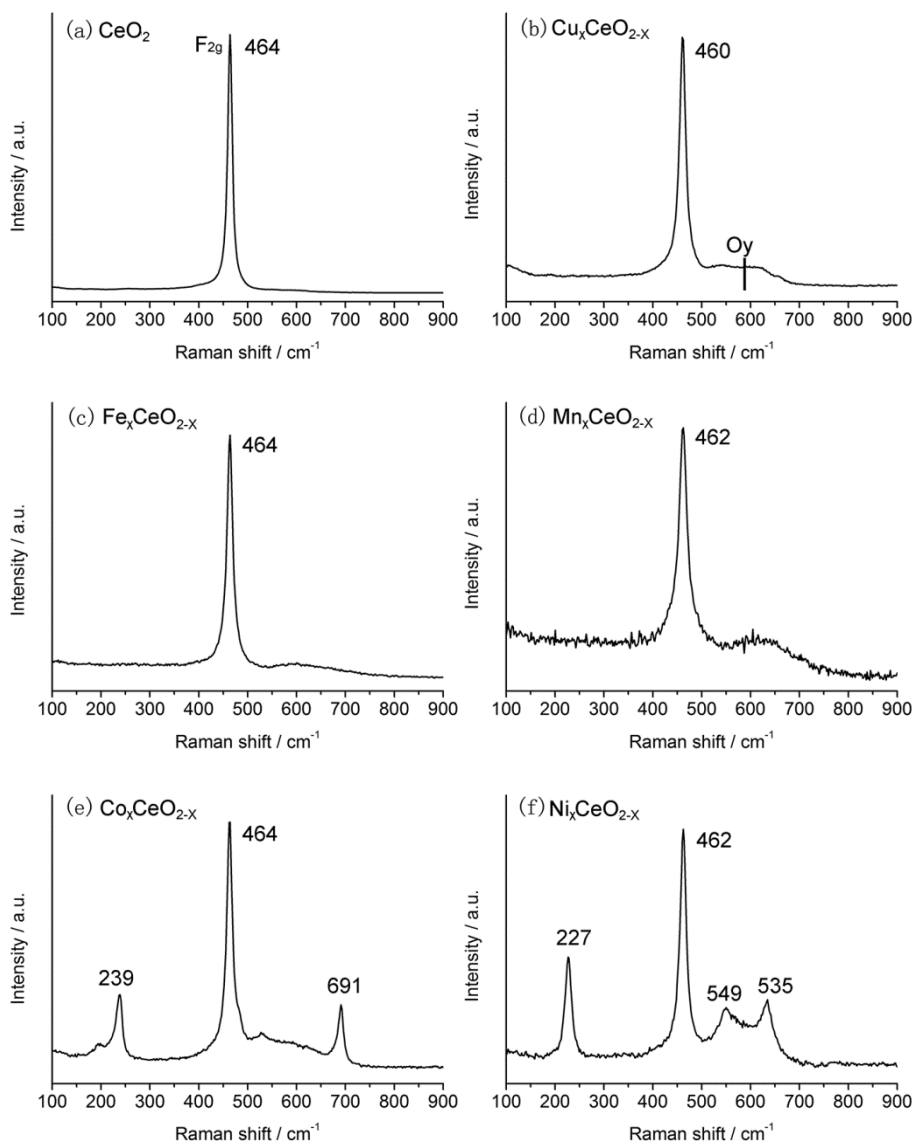

**Supplementary Figure S7.** Raman spectra of the metal substituted materials: (a)  $\text{CeO}_2$ , (b)  $\text{Cu}_x\text{CeO}_{2-x}$ , (c)  $\text{Fe}_x\text{CeO}_{2-x}$ , (d)  $\text{Mn}_x\text{CeO}_{2-x}$ , (e)  $\text{Co}_x\text{CeO}_{2-x}$  and (f)  $\text{Ni}_x\text{CeO}_{2-x}$  microspheres.

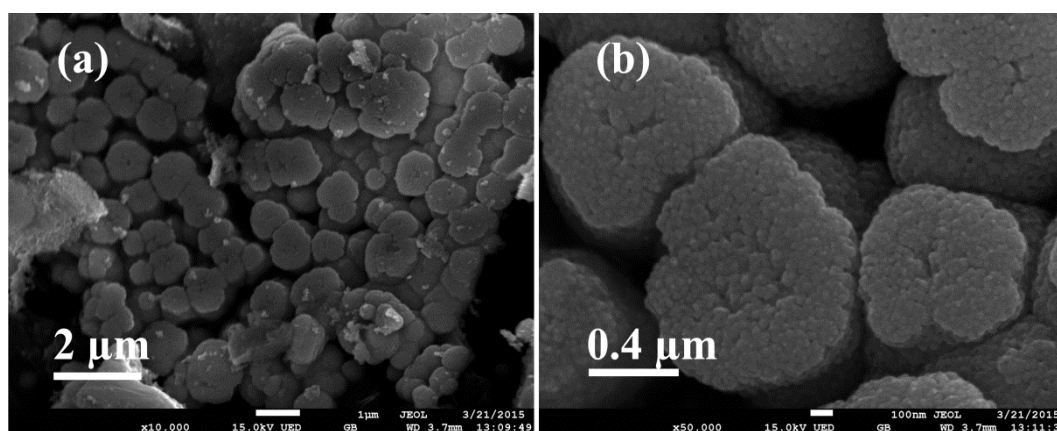

**Supplementary Figure S8.** SEM images of  $\text{Cu}_x\text{CeO}_{2-x}$  composite.

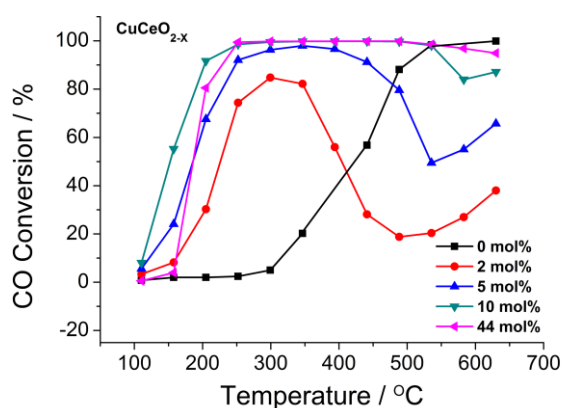

**Supplementary Figure S9.** CO catalytic oxidation on  $\text{Cu}_x\text{CeO}_{2-x}$  microspheres with different Cu contents.

**Supplementary Table S3.** Catalytic activities of different hybrid  $\text{CeO}_2$  microspheres.

| Entry          | Microspheres                  | Special Treatment               | Metal Content (mol%)<br>by ICP-OES | $T_{100}$ (°C) | $T_{50}$ (°C) |
|----------------|-------------------------------|---------------------------------|------------------------------------|----------------|---------------|
| 1 <sup>a</sup> | $\text{Cu}_x\text{CeO}_{2-x}$ | Without Cu doping               | 0                                  | 520            | 421           |
| 2              | $\text{Cu}_x\text{CeO}_{2-x}$ | —                               | 2                                  | Above 600      | 226           |
| 3              | $\text{Cu}_x\text{CeO}_{2-x}$ | —                               | 5                                  | 350            | 185           |
| 4              | $\text{Cu}_x\text{CeO}_{2-x}$ | —                               | 10                                 | 300            | 150           |
| 5 <sup>b</sup> | $\text{Cu}_x\text{CeO}_{2-x}$ | Without template                | 10                                 | 300            | 218           |
| 6              | $\text{Cu}_x\text{CeO}_{2-x}$ | Without $\text{H}_2$ activation | 10                                 | 300            | 231           |
| 7              | $\text{Cu}_x\text{CeO}_{2-x}$ | —                               | 44                                 | 253            | 186           |
| 8              | $\text{Fe}_x\text{CeO}_{2-x}$ | —                               | 10                                 | Above 600      | 361           |
| 9              | $\text{Ni}_x\text{CeO}_{2-x}$ | —                               | 10                                 | 350            | 223           |
| 10             | $\text{Co}_x\text{CeO}_{2-x}$ | —                               | 10                                 | 300            | 216           |
| 11             | $\text{Mn}_x\text{CeO}_{2-x}$ | —                               | 10                                 | 600            | 259           |

<sup>a</sup>  $\text{Cu}_x\text{CeO}_{2-x}$  without Cu doping was  $\text{CeO}_2$  microsphere.

<sup>b</sup>  $\text{Cu}_x\text{CeO}_{2-x}$  without template was  $\text{Cu}_x\text{CeO}_{2-x}$  composite.

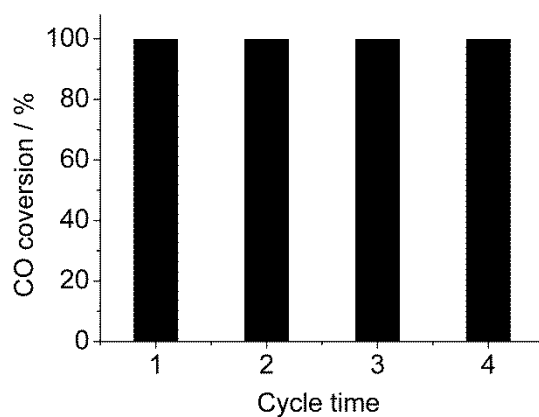

**Supplementary Figure S10.** Cycling CO conversion of  $\text{Cu}_x\text{CeO}_{2-x}$  microspheres.
